# Supplementary material for: Effective chemical potential for non-equilibrium systems and its application to molecular beam epitaxy of Bi2Se3
Source: Royal Society of Chemistry journal article supplement (doi:10.1039/c8na00136g), 2018-10-10
Supplement: c8na00136g1.pdf [file c8na00136g1.pdf]

**Supplementary information for “Effective chemical potential for non-equilibrium system and its application to molecular beam epitaxy of  $\text{Bi}_2\text{Se}_3$ ”**

Na Wang<sup>1,2,3</sup>, Damien West<sup>3</sup>, Wenhui Duan<sup>1</sup>, and S. B. Zhang<sup>3,4</sup>

<sup>1</sup>Department of Physics, Tsinghua University, Beijing 100084, China

<sup>2</sup>Department of Physical Chemistry, University of Science and Technology Beijing, Beijing  
100083, China

<sup>3</sup>Department of Physics, Applied Physics & Astronomy, Rensselaer Polytechnic Institute, Troy,  
NY 12180

<sup>4</sup>Beijing Computational Science Research Center, Beijing 100193, China

### General expression for the association rate $k_{\alpha}^{+i}$

When the association is not diffusion-limited, the following rate equation applies [1],

$$k_{\alpha}^{+i} = 2\pi(D_{\alpha} + D_i) \frac{k_{\alpha,0}^{+i}}{k_{\alpha,0}^{+i} + k_{\alpha \oplus i}^{-i}}, \quad (\text{S1})$$

where

$$k_{\alpha,0}^{+i} = \nu \text{Exp}(-\varphi_{\alpha,0}^{+i}/kT) \quad (\text{S2})$$

is the on-site association rate between cluster  $\alpha$  and cluster  $i$ . Here, on-site means the two clusters are nearest-neighbor clusters (denoted as  $\alpha \oplus i$ ), and

$$k_{\alpha \oplus i}^{-i} = \nu \text{Exp}(-\varphi_{\alpha \oplus i}^{-i}/kT) \quad (\text{S3})$$

is the dissociation rate of the above nearest-neighbor cluster pair  $\alpha \oplus i$ .  $k_{\alpha \oplus i}^{-i}$  enters the denominator in Eq. (S1) because it competes with on-site association to form cluster  $\alpha + i$ . In Eqs. (S2) and (S3),  $\varphi_{\alpha,0}^{+i}$  and  $\varphi_{\alpha \oplus i}^{-i}$  are the respective activation barriers.

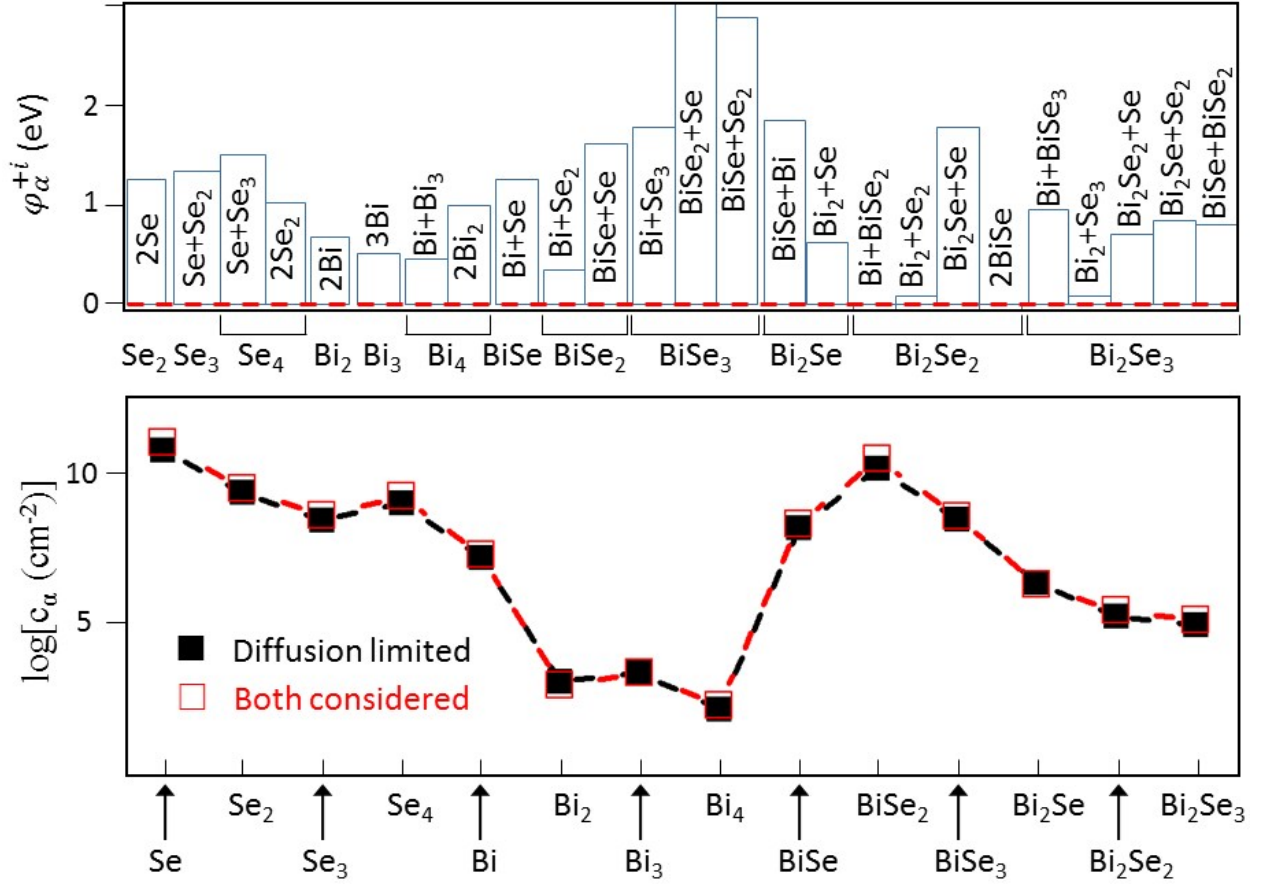

FIG. S1: (a) Calculated association barriers ( $\varphi_{\alpha}^{+i}$ ) for the clusters in Fig. 2. (b) Concentrations of the clusters: (red open squares) both association and diffusion processes are considered; (black filled squares) only diffusion-limited process is considered. In the calculation, we ignore the weak interaction between clusters, whereby we approximate  $\varphi_{\alpha,0}^{+i} \simeq E_{0\alpha} + E_{0i} - E_{0\alpha+i} + \varphi_{\alpha+i}^{-i}$ , where  $E_{0\alpha}$  is the total energy of cluster  $\alpha$  on the surface relative to the isolated constituent atoms, and  $\varphi_{\alpha\oplus i}^{-i} \simeq \varphi_i^{\text{diff}}$ . The reason that the diffusion-limited-process assumption works for  $\text{Bi}_2\text{Se}_3$  is because the most probable clusters, i.e., atomic Se and  $\text{BiSe}_2$ , happen to have the largest diffusion barriers in Fig. 3(a).

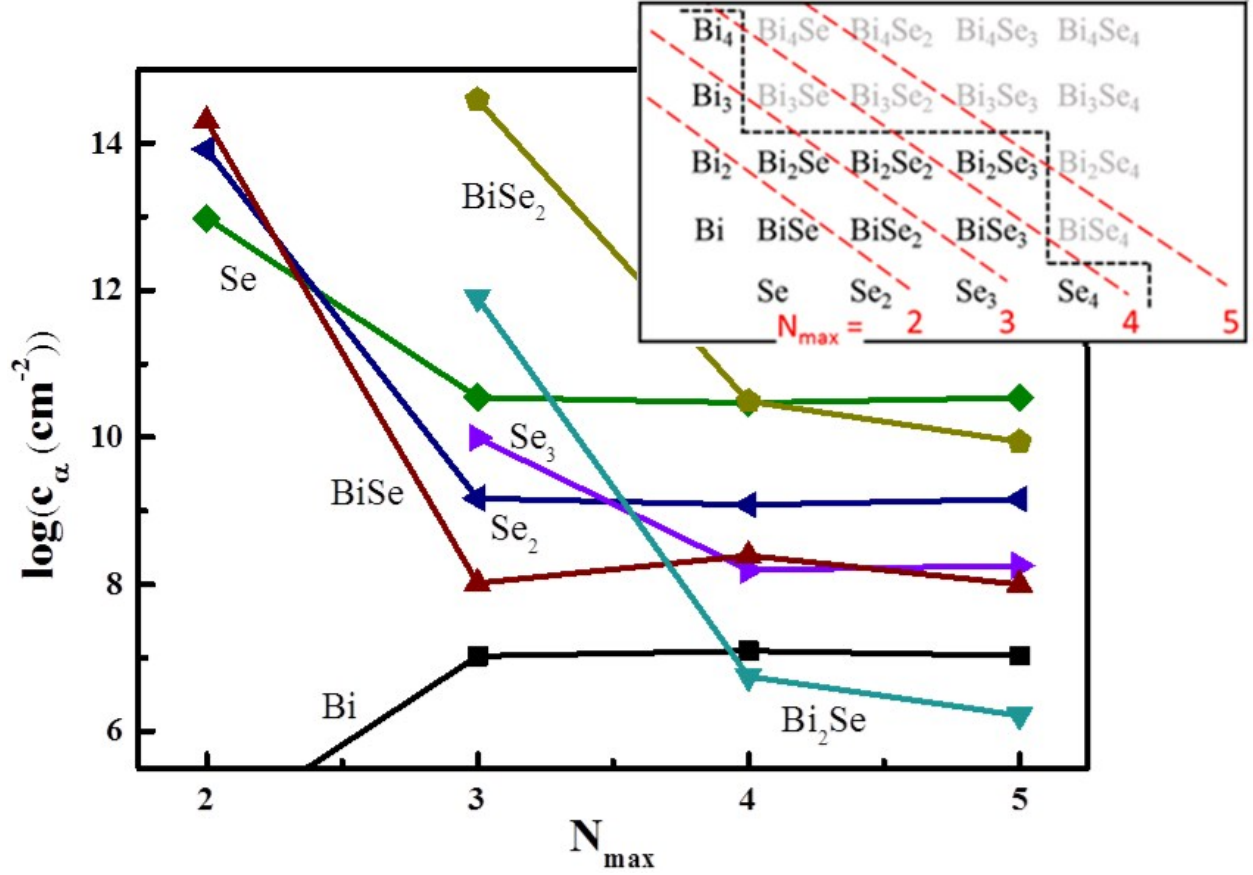

FIG. S2: Cluster concentration  $c_\alpha$  as a function of the maximum cluster size  $N_{max}$  used in the calculation, which is defined by the red dashed lines in the inset. In principle, two clusters can associate to form a larger one so the inclusion of larger clusters will affect the concentration of the smaller clusters. If we define  $\delta N_\alpha = N_{max} - N_\alpha$ , where  $N_\alpha$  is the size of cluster  $\alpha$ , then the effect of  $N_{max}$  on  $c_\alpha$  appears to be the largest only when  $\delta N_\alpha = 1$ , as can be seen in Fig. S2. In the current study, we choose  $N_{max} = 4$  but exclude  $Bi_3Se$  for its relatively high energy. We also include  $Bi_2Se_3$  in the cluster set for it is the smallest molecular unit to build bulk  $Bi_2Se_3$ . Our use of  $N_{max} = 4$  is reasonable, as our results show that the largest cluster relevant to the growth,  $BiSe_2$ , has  $N_{max} = 3$ .

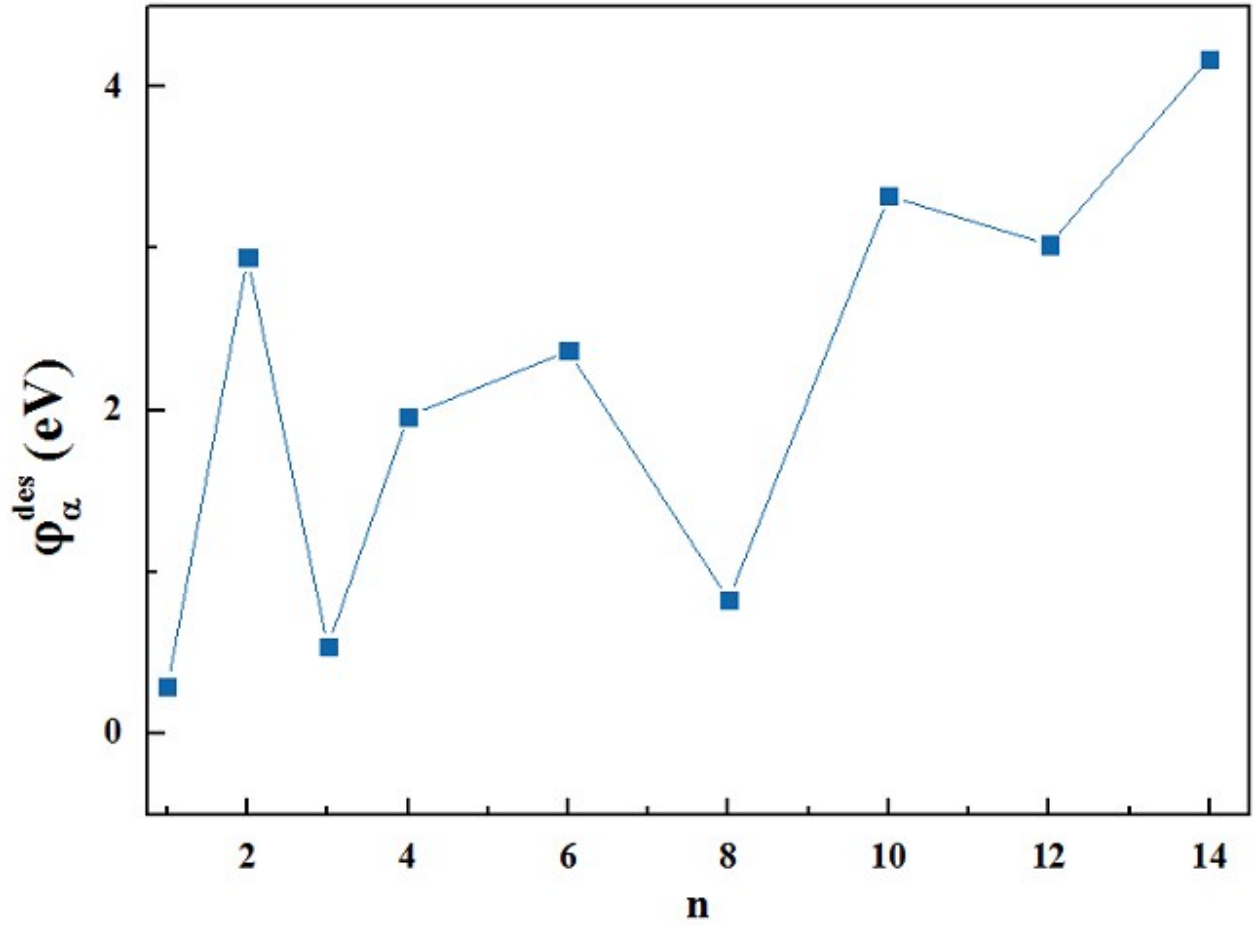

FIG. S3: Desorption barrier ( $\phi_{\alpha}^{des}$ ) for molecular clusters  $(\text{Bi}_2\text{Se}_3)_n$ , as a function of molecule size  $n$ . The general trend is that as  $n$  increases, it gets harder to desorb the molecules.

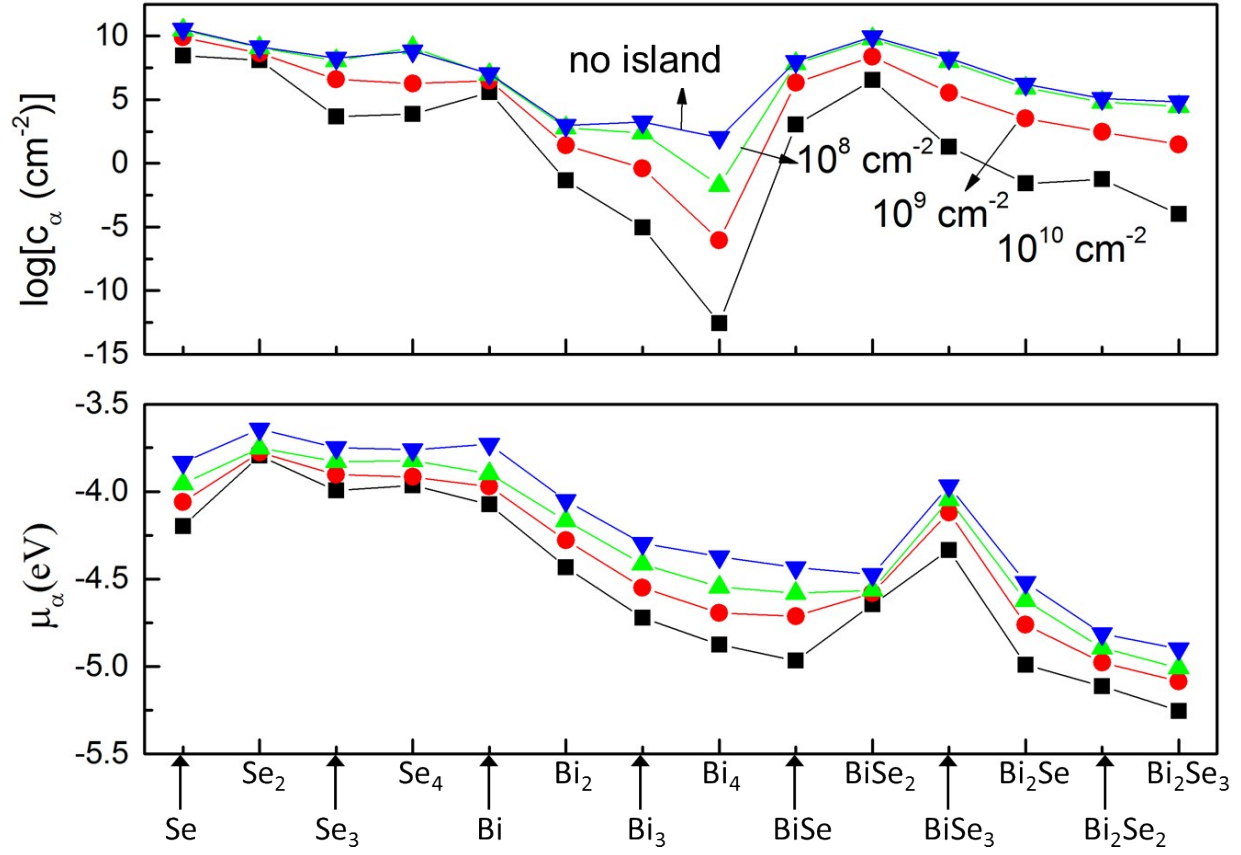

FIG. S4: Calculated (a) cluster concentration  $c_\alpha$  and (b) chemical potential  $\mu_\alpha$ , as a function of the predetermined island density  $c_{isl}$ . These results show that the change in  $\mu_\alpha$  due to  $c_{isl}$  is relatively small, only 0.3 eV, which is on par with the numerical accuracy achievable in this kind of calculations.

## Reference

- [1] P. Atkins and J. D. Paula, *Physical Chemistry* (Oxford University Press, Great Britain, 2006), 8th edn.
